# Supplementary material
Source: Springer Nature journal article supplement (https://www.springermedizin.de/resource/supplementary/12916_2010_352_MOESM2_ESM.pdf/9599824)

**Clopidogrel Responder**

**Low-Responder**

High Clopidogrel Dose

Ticlopidine

Definite Low-Responder

MeSAMP Test  
(=ADP P2Y12 Receptor Antagonist)

Longterm Clopidogrel Tx

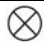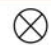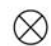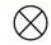

Supplement: MOESM2 [file 9599824]
